# Supplementary material for: Theoretical study of CO2 adsorption on Pt
Source: Royal Society of Chemistry journal article supplement (doi:10.1039/c9nj03092a), 2019-01-01
Supplement: c9nj03092a1.pdf [file c9nj03092a1.pdf]

## Supplementary information

### Theoretical study of CO<sub>2</sub> adsorption on Pt

Shofu Matsuda,<sup>a</sup> Tsuyoshi Mukai,<sup>a</sup> Seishiro Sakurada,<sup>a</sup> Nozomu Uchida,<sup>\*a</sup> and Minoru Umeda <sup>\*a</sup>

<sup>a</sup> *Department of Materials Science and Technology, Graduate School of Engineering, Nagaoka University of Technology, 1603-1 Kamitomioka, Nagaoka, Niigata 940-2188, Japan*

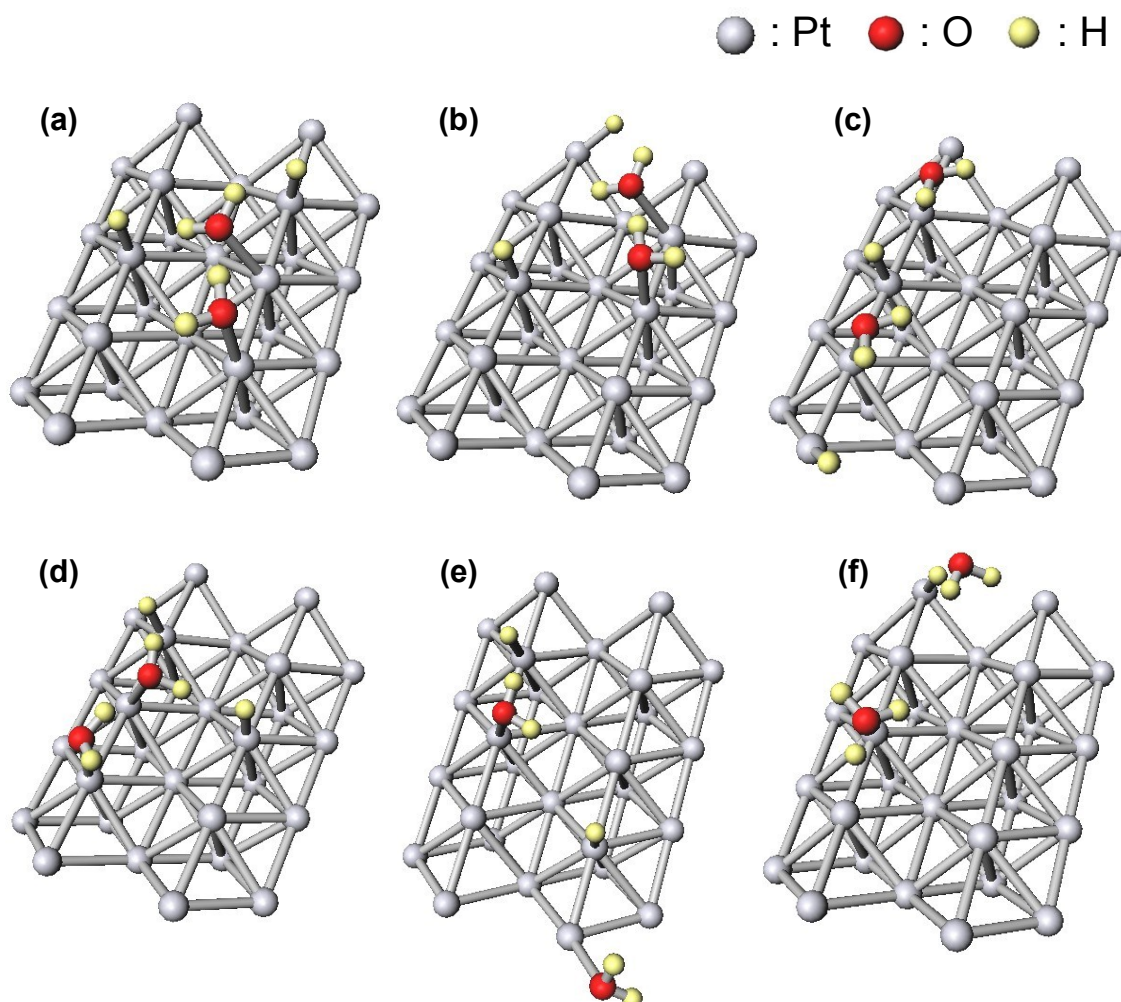

**Fig. S1** The calculation results of the adsorption structure in which two molecules of H<sub>3</sub>O<sup>+</sup> are adsorbed to a Pt (110) cluster.

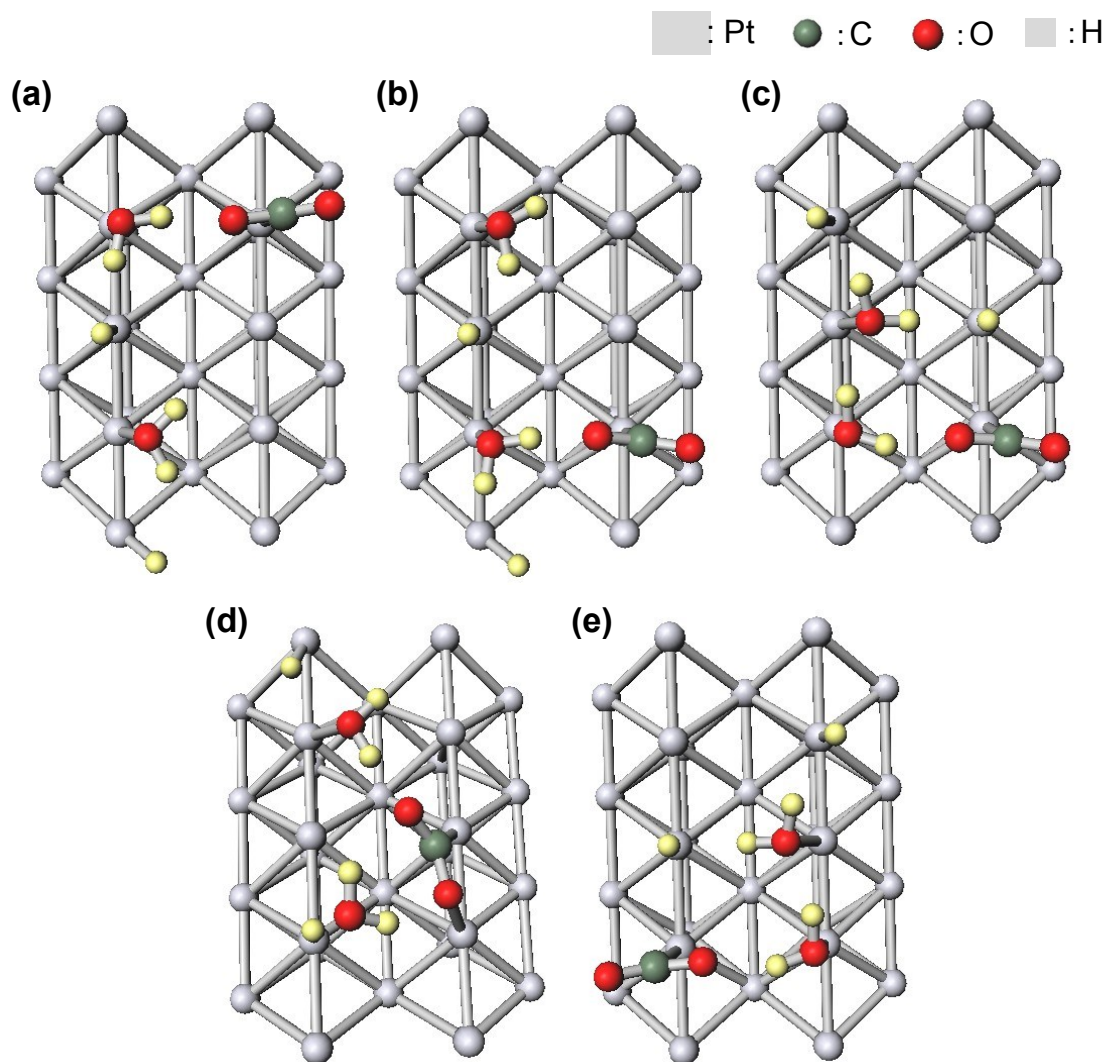

**Fig. S2** The calculation results of the CO<sub>2</sub>-adsorbed state, except for Fig. 3a.

**Table S1**  $\Delta G_{\text{ads}}$  values for all six CO<sub>2</sub>-adsorbed states.

|          | $\Delta G_{\text{ads}} / \text{kJ mol}^{-1}$ |
|----------|----------------------------------------------|
| Fig. 3a  | -160                                         |
| Fig. S2a | -153                                         |
| Fig. S2b | -155                                         |
| Fig. S2c | -159                                         |
| Fig. S2d | -147                                         |
| Fig. S2e | -157                                         |

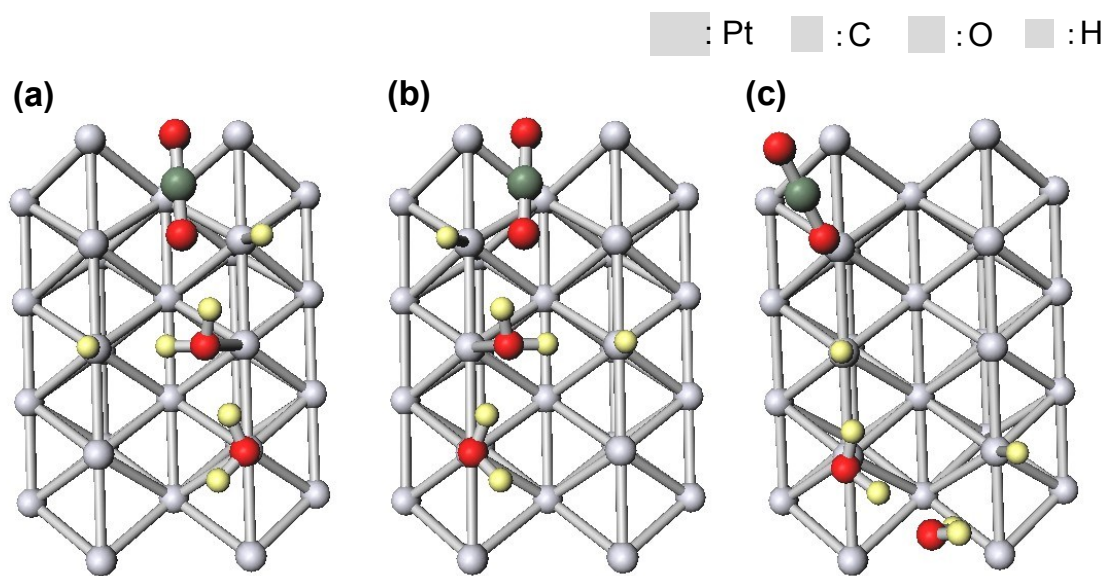

**Fig. S3** The calculation results of the CO<sub>2</sub> non-adsorbed state.
